# Supplementary material for: Assessment of Compound-Specific Fatty Acid δ13C and δ2H Values to Track Fish Mobility in a Small Sub-alpine Catchment
Source: PubMed Central journal article supplement (PMC9352314; doi:10.1021/acs.est.2c02089), 2022-07-21
Supplement: es2c02089_si_001.pdf [file es2c02089_si_001.pdf]

**Assessment of compound-specific fatty acid  $\delta^{13}\text{C}$  and  $\delta^2\text{H}$  values to track fish mobility  
in a small subalpine catchment**

Matthias Pilecky<sup>1,2,\*</sup>, Libor Závorka<sup>1</sup>, David X. Soto<sup>3</sup>, Fen Guo<sup>4</sup>, Leonard I. Wassenaar<sup>1,2,5</sup>,  
and Martin J. Kainz<sup>1,2</sup>

*Supplementary Information*

- 1) WasserCluster Lunz – Biologische Station, Inter-University Center for Aquatic Ecosystem Research, Dr. Carl-Kupelwieser Promenade 5, 3293 Lunz am See, Austria
- 2) Donau-Universität Krems, Department for Biomedical Research, Dr. Karl-Dorrek-Straße 30, 3500 Krems, Austria
- 3) International Atomic Energy Agency, Isotope Hydrology Section, Vienna International Centre, A-1400, Vienna, Austria
- 4) Guangdong Provincial Key Laboratory of Water Quality Improvement and Ecological Restoration for Watersheds, Institute of Environmental and Ecological Engineering, Guangdong University of Technology, Guangzhou, 511458, China
- 5) University of Saskatchewan, Dept. of Geological Science, 114 Science Place, Saskatoon, SK S7N 5E2, Canada

\*) corresponding author

LZ: [libor.zavorka@wcl.ac.at](mailto:libor.zavorka@wcl.ac.at) (ORCID: 0000-0002-0489-3681)

MP: [matthias.pilecky@donau-uni.ac.at](mailto:matthias.pilecky@donau-uni.ac.at) (0000-0002-3404-5923)

MJK: [martin.kainz@donau-uni.ac.at](mailto:martin.kainz@donau-uni.ac.at) (ORCID: 0000-0002-2388-1504)

FG: [fen.guo@gdut.edu.cn](mailto:fen.guo@gdut.edu.cn) (ORCID: 0000-0002-4976-5456)

LIW: [len.wassenaar@usask.ca](mailto:len.wassenaar@usask.ca) (ORCID: 0000-0001-5532-0771)

DXS: [d.soto@iaea.org](mailto:d.soto@iaea.org) (ORCID: 0000-0003.4210-293X)

Table S1. Mean fatty acid bulk  $\delta^{13}\text{C}$  and  $\delta^2\text{H}$  values and standard deviation at individual sampling sites (2016).

| Site                       | Taxa             | n  | $\delta^{13}\text{C}_{\text{FAbulk}}$ vs. VPDB |             |             |             | $\delta^2\text{H}_{\text{FAbulk}}$ vs. VSMOW |               |               |               |
|----------------------------|------------------|----|------------------------------------------------|-------------|-------------|-------------|----------------------------------------------|---------------|---------------|---------------|
|                            |                  |    | brain                                          | eye         | liver       | muscle      | brain                                        | eye           | liver         | muscle        |
| Bodingbach                 | <i>C. gobio</i>  | 3  | -37.1 ± 0.3                                    | -36.6 ± 0.0 | -37.9 ± 1.0 | -39.0 ± 0.9 | -290.6 ± 1.4                                 | -265.6 ± 0.0  | -277.0 ± 21.7 | -278.8 ± 22.9 |
|                            | <i>O. mykiss</i> | 3  | -35.6 ± 0.2                                    | -37.4 ± 1.5 | -37.8 ± 1.4 | -39.3 ± 0.8 | -294.0 ± 10.4                                | -283.4 ± 12.5 | -270.9 ± 15.7 | -277.6 ± 13.5 |
|                            | <i>S. trutta</i> | 3  | -37.1 ± 1.0                                    | -37.7 ± 0.0 | -38.5 ± 0.8 | -38.4 ± 2.2 | -306.1 ± 2.9                                 | -290.7 ± 0.0  | -276.3 ± 14.6 | -290.0 ± 16.9 |
| Faltlbach                  | <i>C. gobio</i>  | 13 | -39.6 ± 0.8                                    | -38.9 ± 1.9 | -39.2 ± 1.5 | -40.5 ± 1.2 | -272.8 ± 5.8                                 | -247.4 ± 15.3 | -237.2 ± 10.1 | -257.4 ± 11.9 |
| Kothbergbach (oben)        | <i>C. gobio</i>  | 4  | -37.9 ± 0.9                                    | -38.0 ± 0.0 | -37.7 ± 1.0 | -38.2 ± 1.6 | -278.9 ± 4.9                                 | -256.8 ± 0.0  | -231.8 ± 4.1  | -249.1 ± 2.3  |
|                            | <i>O. mykiss</i> | 1  | -35.8 ± NA                                     | -37.4 ± NA  | -37.1 ± NA  | -38.3 ± NA  | -300.1 ± NA                                  | -265.3 ± NA   | -269.3 ± NA   | -272.6 ± NA   |
|                            | <i>S. trutta</i> | 1  | -34.3 ± NA                                     | -37.4 ± NA  | -37.2 ± NA  | -37.8 ± NA  | -285.3 ± NA                                  | -258.2 ± NA   | -243.2 ± NA   | -256.4 ± NA   |
| Kothbergbach (unten)       | <i>C. gobio</i>  | 1  | -38.1 ± NA                                     | -39.8 ± NA  | -38.4 ± NA  | -38.4 ± NA  | -288.1 ± NA                                  | -258.5 ± NA   | -251.1 ± NA   | -264.5 ± NA   |
|                            | <i>S. trutta</i> | 5  | -36.2 ± 0.7                                    | -37.5 ± 1.7 | -38.1 ± 1.1 | -39.0 ± 1.3 | -299.2 ± 8.0                                 | -292.5 ± 8.7  | -268.8 ± 7.9  | -277.9 ± 5.3  |
| Lackenbach                 | <i>C. gobio</i>  | 3  | -37.6 ± NA                                     | -37.8 ± NA  | -38.0 ± NA  | -38.6 ± 1.0 | -290.9 ± NA                                  | -274.5 ± NA   | -255.7 ± NA   | -282.6 ± 8.4  |
|                            | <i>O. mykiss</i> | 8  | -36.3 ± 0.4                                    | -38.1 ± 1.0 | -37.6 ± 0.3 | -38.8 ± 0.8 | -297.0 ± 8.0                                 | -275.6 ± 5.4  | -272.7 ± 3.7  | -282.5 ± 4.1  |
|                            | <i>S. trutta</i> | 1  | -37.6 ± NA                                     | -37.8 ± NA  | NA          | -38.0 ± NA  | -290.9 ± NA                                  | -274.5 ± NA   | NA            | -282.8 ± NA   |
| Oberer Seebach (Lend)      | <i>C. gobio</i>  | 3  | -35.1 ± 1.0                                    | -35.3 ± 0.9 | -35.4 ± 0.2 | -35.6 ± 0.5 | -282.2 ± 17.9                                | -286.8 ± 0.3  | -272.2 ± 9.9  | -273.8 ± 13.1 |
|                            | <i>S. trutta</i> | 7  | -34.0 ± 1.0                                    | -36.0 ± 0.8 | -35.6 ± 1.2 | -36.3 ± 0.9 | -295.8 ± 3.8                                 | -281.6 ± 11.6 | -264.9 ± 17.6 | -275.1 ± 6.9  |
| Oberer Seebach (Ritrodat)  | <i>C. gobio</i>  | 5  | -33.6 ± 0.4                                    | -35.5 ± 1.6 | -34.6 ± 1.2 | -34.9 ± 1.4 | -282.7 ± 12.0                                | -256.4 ± 16.0 | -267.7 ± 7.5  | -268.9 ± 9.1  |
|                            | <i>S. trutta</i> | 6  | -32.7 ± 0.6                                    | -34.9 ± 0.8 | -34.9 ± 1.1 | -35.4 ± 0.7 | -296.3 ± 4.5                                 | -277.0 ± 5.5  | -267.1 ± 5.3  | -278.3 ± 3.4  |
| Ois (alte Säge)            | <i>O. mykiss</i> | 5  | -36.8 ± 0.8                                    | -39.0 ± 0.4 | NA          | -38.8 ± 0.3 | -293.9 ± 6.2                                 | -290.5 ± 5.7  | NA            | -284.7 ± 13.4 |
|                            | <i>S. trutta</i> | 5  | -36.6 ± 1.7                                    | -38.6 ± 1.5 | NA          | -38.8 ± 1.2 | -289.8 ± 12.8                                | -284.1 ± 7.2  | NA            | -283.3 ± 7.1  |
| Ois (Holzhüttenboden)      | <i>C. gobio</i>  | 8  | -35.7 ± 0.3                                    | -35.5 ± 0.6 | -36.6 ± 1.1 | -37.0 ± 0.8 | -282.2 ± 6.0                                 | -269.2 ± 2.1  | -261.7 ± 13.9 | -278.3 ± 6.9  |
|                            | <i>S. trutta</i> | 3  | -35.0 ± 0.4                                    | -37.4 ± 1.5 | -37.1 ± NA  | -37.6 ± NA  | -298.7 ± 3.9                                 | -282.7 ± 0.4  | -280.7 ± NA   | -287.0 ± NA   |
| Tagles (unten)             | <i>C. gobio</i>  | 6  | -36.1 ± 1.0                                    | -37.6 ± 1.0 | -37.2 ± 1.2 | -37.4 ± 1.0 | -292.0 ± 5.8                                 | -280.2 ± 0.2  | -283.6 ± 9.1  | -284.1 ± 4.0  |
|                            | <i>S. trutta</i> | 6  | -34.6 ± 0.7                                    | -37.9 ± 2.1 | -36.5 ± 1.3 | -36.8 ± 1.0 | -301.6 ± 6.0                                 | -292.2 ± 3.7  | -287.8 ± 5.7  | -290.2 ± 4.0  |
| Taschlbach                 | <i>S. trutta</i> | 7  | -39.6 ± 0.3                                    | -41.9 ± 1.5 | -40.1 ± 1.0 | -42.0 ± 0.6 | -301.3 ± 6.6                                 | -280.2 ± 10.4 | -254.2 ± 7.6  | -278.7 ± 7.9  |
| Weißer Ois (Rehberghütte)  | <i>S. trutta</i> | 16 | -38.8 ± 0.9                                    | -40.6 ± 0.9 | -39.8 ± 1.4 | -41.5 ± 1.1 | -287.3 ± 5.7                                 | -264.9 ± 3.4  | -259.3 ± 10.9 | -284.4 ± 6.2  |
| Weißer Ois (Faltl)         | <i>S. trutta</i> | 2  | -37.6 ± 1.8                                    | -41.4 ± 2.8 | -38.7 ± 2.3 | -40.6 ± 2.9 | -294.0 ± 4.2                                 | -271.5 ± 0.3  | -255.9 ± 7.3  | -258.6 ± 14.9 |
| Ybbs (Göstling, Lagerhaus) | <i>C. gobio</i>  | 5  | -35.3 ± 0.7                                    | -35.2 ± 0.9 | -36.3 ± 1.6 | -36.8 ± 1.3 | -289.5 ± 4.4                                 | -267.7 ± 8.5  | -271.3 ± 8.3  | -272.6 ± 14.4 |
|                            | <i>O. mykiss</i> | 6  | -35.1 ± 0.6                                    | -36.9 ± 1.1 | -36.8 ± 0.6 | -37.5 ± 0.9 | -305.1 ± 4.5                                 | -286.2 ± 7.9  | -278.6 ± 7.5  | -289.1 ± 3.2  |
|                            | <i>S. trutta</i> | 1  | -33.9 ± NA                                     | -37.8 ± NA  | -34.8 ± NA  | -36.1 ± NA  | -301.3 ± NA                                  | NA            | -258.9 ± NA   | -280.7 ± NA   |
| Ybbs (Kläranlage Lunz)     | <i>C. gobio</i>  | 7  | -36.1 ± 0.8                                    | -36.3 ± 1.7 | -36.3 ± 1.3 | -36.2 ± 0.8 | -291.5 ± 8.5                                 | -258.8 ± 3.9  | -266.6 ± 16.1 | -269.9 ± 9.1  |
|                            | <i>O. mykiss</i> | 2  | -36.1 ± NA                                     | -36.5 ± 0.4 | -37.3 ± 1.4 | -36.7 ± 1.2 | -301.1 ± NA                                  | -292.9 ± 1.2  | -281.5 ± 29.0 | -288.0 ± 1.8  |
|                            | <i>S. trutta</i> | 2  | -35.5 ± 0.0                                    | -35.2 ± 0.0 | -37.2 ± NA  | -36.1 ± 0.0 | -304.1 ± 0.0                                 | -279.2 ± 4.0  | -281.9 ± NA   | -274.1 ± 3.1  |
| Ybbs (Lunz Großau)         | <i>C. gobio</i>  | 4  | -35.1 ± 0.6                                    | -34.9 ± 0.9 | -34.9 ± 0.7 | -35.4 ± 0.6 | -284.1 ± 2.6                                 | -252.7 ± 4.5  | -258.8 ± 17.7 | -270.0 ± 7.0  |
|                            | <i>O. mykiss</i> | 7  | -35.0 ± 1.0                                    | -36.4 ± 1.7 | -36.4 ± 0.5 | -36.6 ± 0.9 | -303.3 ± 7.2                                 | -277.0 ± 18.7 | -285.5 ± 7.0  | -290.7 ± 6.7  |

**Figure S2.** Changes in fish fatty acid isotope values for (A)  $\delta^{13}\text{C}$  and (B)  $\delta^2\text{H}$  at 9 different sampling sites between 2016 and 2018.

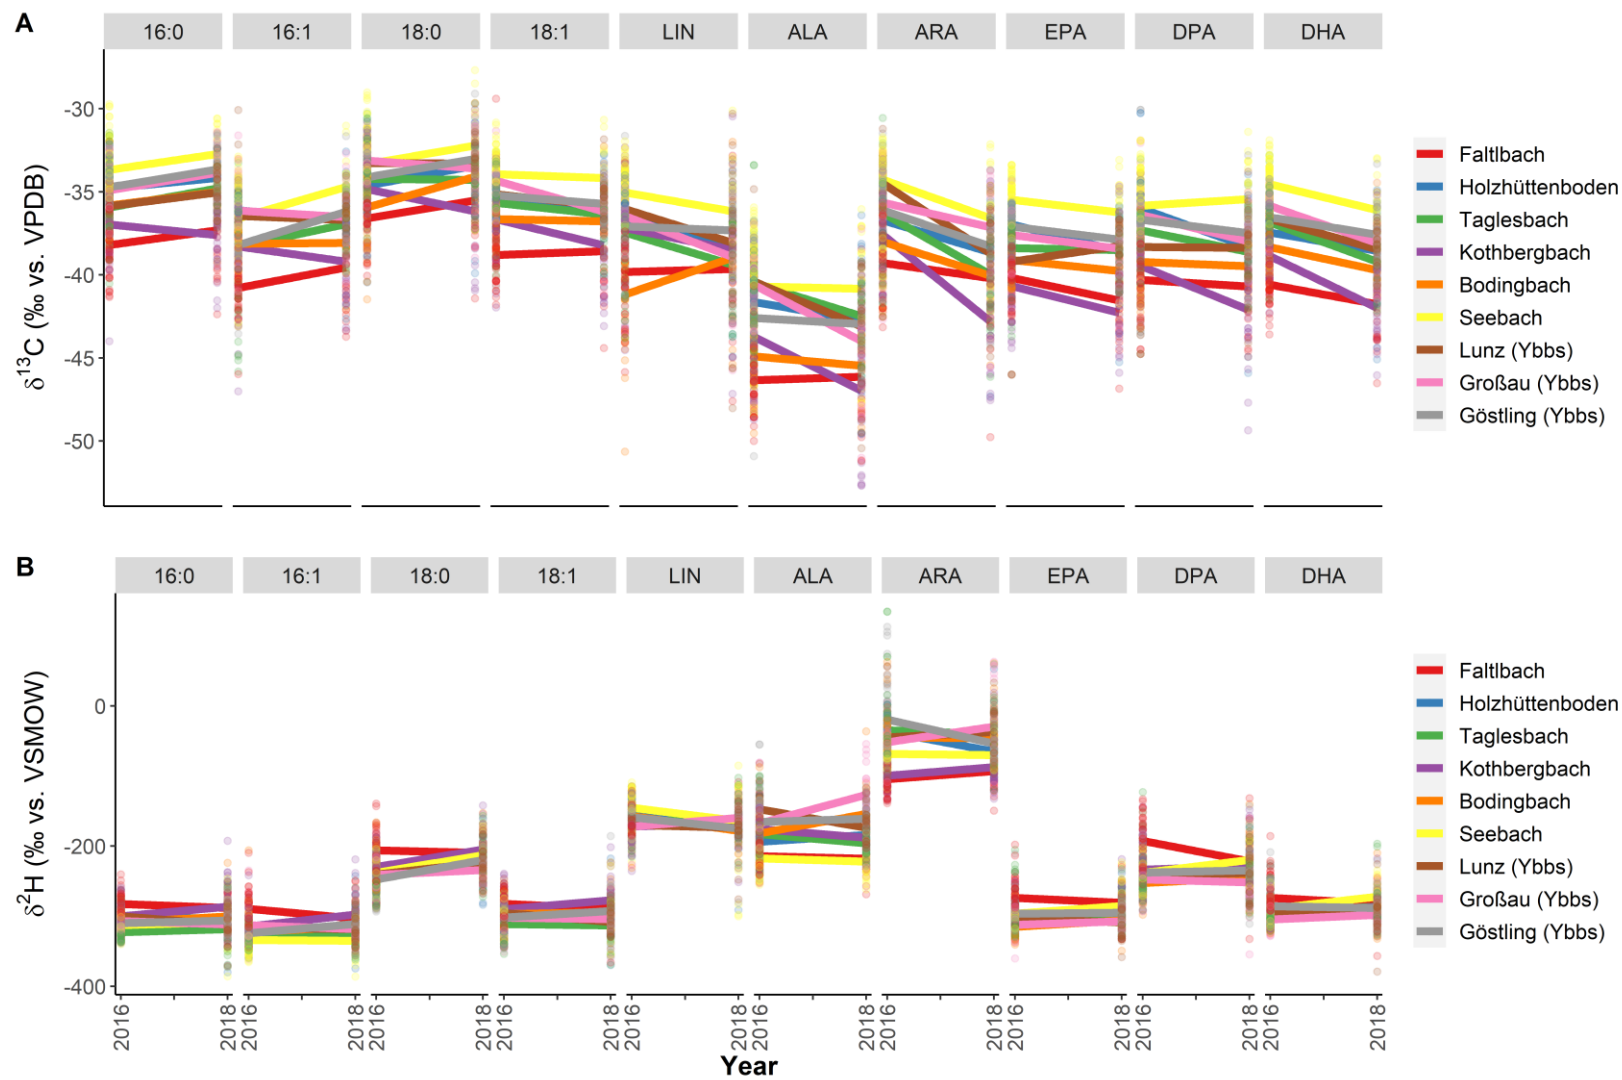

**Figure S3. LDA of  $\delta^2\text{H}$  and  $\delta^{13}\text{C}$  values of 11 FA quantified in all samples;** proportions of trace: LD1 = 48.2 %, LD2 = 23.6 %, LD3 = 7.8 %). Interactive 3Dplot of the first three dimensions of the LDA site-specificity plot downloadable as .html-file.
